# Supplementary material for: Cognitive dedifferentiation as a function of cognitive impairment in the ADNI and MemClin cohorts
Source: publisher site journal article supplement (doi:10.18632/aging.203108), 2021-05-26
Supplement: Supplementary file [file aging-v13i10-203108-supplementary-material-SD1.pdf]

**SUPPLEMENTARY TABLES**

**Supplementary Table 1. Principal component analysis by subgroups after propensity score matching, ADNI.**

| <b>CI group (n = 392)</b>         |            |            |            |            |            |            |
|-----------------------------------|------------|------------|------------|------------|------------|------------|
|                                   | <b>PC1</b> | <b>PC2</b> | <b>PC3</b> | <b>PC4</b> | <b>PC5</b> | <b>PC6</b> |
| Standard deviation                | 2.8219     | 1.3263     | 0.9675     | 0.9160     | 0.8132     | 0.7417     |
| Proportion of variance            | 0.5309     | 0.1173     | 0.0624     | 0.0559     | 0.0441     | 0.0367     |
| Cumulative proportion of variance | 0.5309     | 0.6481     | 0.7106     | 0.7665     | 0.8109     | 0.8473     |
| Individual test loadings          |            |            |            |            |            |            |
| MMSE                              | -0.2520    | 0.1396     | -0.1920    | 0.1648     | 0.0883     | -0.3796    |
| Clock test                        | -0.2030    | 0.3575     | 0.1946     | 0.2835     | 0.1469     | -0.5835    |
| Copy test                         | -0.1161    | 0.3926     | 0.5224     | 0.3829     | -0.5205    | 0.2608     |
| AVLT 1                            | -0.2438    | -0.0350    | 0.2880     | -0.5600    | -0.1158    | -0.1179    |
| AVLT 2                            | -0.3024    | -0.1348    | 0.1988     | -0.2179    | 0.0112     | 0.0164     |
| AVLT 3                            | -0.3122    | -0.1978    | 0.1170     | -0.0538    | -0.0688    | -0.0297    |
| AVLT 4                            | -0.3178    | -0.1944    | 0.0405     | 0.0427     | -0.0366    | -0.0579    |
| AVLT 5                            | -0.3133    | -0.2110    | -0.007     | 0.0967     | 0.0227     | -0.0274    |
| AVLT total                        | -0.3376    | -0.1873    | 0.1156     | -0.0969    | -0.0328    | -0.0432    |
| AVLT delayed                      | -0.2597    | -0.3144    | -0.0800    | 0.2842     | -0.0341    | 0.1792     |
| AVLT recognition                  | -0.2380    | -0.1628    | -0.2310    | 0.4567     | 0.1842     | 0.2374     |
| Semantic fluency Animals          | -0.2447    | 0.2077     | -0.3321    | -0.1575    | -0.2641    | 0.3054     |
| TMT A                             | -0.2110    | 0.3900     | 0.0924     | -0.1281    | 0.4338     | 0.4752     |
| TMT B                             | -0.2371    | 0.3590     | -0.1082    | -0.1179    | 0.4078     | 0.0247     |
| BNT spontaneous recall            | -0.1887    | 0.2703     | -0.5576    | -0.1300    | -0.4681    | -0.1346    |
| <b>NCI group (n = 392)</b>        |            |            |            |            |            |            |
|                                   | <b>PC1</b> | <b>PC2</b> | <b>PC3</b> | <b>PC4</b> | <b>PC5</b> | <b>PC6</b> |
| Standard deviation                | 2.3962     | 1.4179     | 1.1249     | 0.9771     | 0.9502     | 0.8920     |
| Proportion of variance            | 0.3828     | 0.1340     | 0.0844     | 0.0637     | 0.0602     | 0.0530     |
| Cumulative proportion of variance | 0.3828     | 0.5168     | 0.6012     | 0.6648     | 0.7250     | 0.7781     |
| Individual test loadings          |            |            |            |            |            |            |
| MMSE                              | -0.1033    | 0.2569     | -0.0807    | 0.2215     | 0.8312     | -0.3164    |
| Clock test                        | -0.0857    | 0.4187     | -0.4669    | -0.2221    | -0.0037    | 0.2391     |
| Copy test                         | -0.0427    | 0.3620     | -0.6225    | 0.0317     | -0.1470    | 0.0698     |
| AVLT 1                            | -0.2725    | -0.1185    | -0.0793    | 0.3971     | -0.1515    | 0.1061     |
| AVLT 2                            | -0.3411    | -0.1028    | -0.0246    | 0.2235     | -0.0387    | 0.1217     |
| AVLT 3                            | -0.3689    | -0.1083    | 0.0042     | -0.0018    | -0.0122    | 0.0360     |
| AVLT 4                            | -0.3658    | -0.1307    | -0.0038    | -0.0182    | 0.0403     | 0.0145     |
| AVLT 5                            | -0.3515    | -0.0721    | -0.0563    | -0.1104    | 0.0426     | 0.0731     |
| AVLT total                        | -0.4055    | -0.1252    | -0.0336    | 0.0942     | -0.0194    | 0.0791     |
| AVLT delayed                      | -0.3231    | -0.1202    | -0.0599    | -0.2049    | 0.0512     | -0.0404    |
| AVLT recognition                  | -0.1926    | -0.0750    | 0.0149     | -0.7437    | 0.0230     | -0.3323    |
| Semantic fluency Animals          | -0.1910    | 0.2635     | 0.1019     | 0.2485     | -0.1818    | -0.5921    |
| TMT A                             | -0.1501    | 0.3627     | 0.4126     | -0.1139    | 0.1677     | 0.3251     |
| TMT B                             | -0.1276    | 0.4136     | 0.3973     | -0.0374    | -0.0088    | 0.3469     |
| BNT spontaneous recall            | -0.1220    | 0.4015     | 0.1854     | 0.0170     | -0.4408    | -0.3316    |

The six first PCs are presented from each PCA with values rounded to four decimals.

**Supplementary Table 2. Principal component analysis by subgroups after propensity score**

**matching, MemClin.**

| <b>CI group (n = 143)</b>                                 |            |            |            |            |            |            |
|-----------------------------------------------------------|------------|------------|------------|------------|------------|------------|
|                                                           | <b>PC1</b> | <b>PC2</b> | <b>PC3</b> | <b>PC4</b> | <b>PC5</b> | <b>PC6</b> |
| Standard deviation                                        | 2.5793     | 1.6616     | 1.3282     | 1.1957     | 1.0906     | 1.0205     |
| Proportion of variance                                    | 0.3326     | 0.1380     | 0.0882     | 0.0715     | 0.0595     | 0.0521     |
| Cumulative proportion of variance                         | 0.3326     | 0.4707     | 0.5589     | 0.6304     | 0.6898     | 0.7419     |
| Individual test loadings                                  |            |            |            |            |            |            |
| MMSE                                                      | -0.1988    | -0.1080    | 0.0587     | -0.1530    | 0.2559     | -0.0030    |
| WAIS-IV Information                                       | -0.1298    | -0.0395    | 0.1048     | -0.1516    | 0.1234     | 0.7551     |
| WAIS-IV Block design                                      | -0.1742    | -0.2480    | -0.2584    | -0.1019    | 0.3309     | 0.0431     |
| WAIS-IV Digit Span total                                  | -0.1450    | -0.3873    | 0.3153     | 0.2209     | -0.0588    | -0.1371    |
| WAIS-IV Digit Span forward                                | -0.0792    | -0.3317    | 0.3611     | 0.2444     | -0.1733    | 0.0587     |
| WAIS-IV Digit Span backward                               | -0.1210    | -0.2652    | 0.3618     | 0.2657     | 0.1127     | -0.1494    |
| AVLT 1                                                    | -0.2829    | 0.1337     | 0.0979     | 0.0761     | 0.1170     | -0.1240    |
| AVLT 2                                                    | -0.3070    | 0.1999     | 0.1075     | 0.1975     | 0.1104     | -0.1092    |
| AVLT 3                                                    | -0.2974    | 0.2651     | 0.0445     | 0.1520     | -0.0157    | 0.0118     |
| AVLT 4                                                    | -0.3033    | 0.2720     | 0.0372     | 0.0623     | -0.0658    | -0.0244    |
| AVLT 5                                                    | -0.2765    | 0.2981     | -0.0128    | 0.0203     | 0.0028     | 0.1165     |
| AVLT total                                                | -0.3386    | 0.2674     | 0.0583     | 0.0998     | 0.0174     | 0.0088     |
| RCFT copy                                                 | -0.0668    | -0.1565    | -0.0032    | -0.1243    | 0.7314     | -0.1314    |
| D-KEFS verbal fluency FAS                                 | -0.2083    | -0.2186    | 0.0862     | -0.1674    | -0.1854    | 0.3260     |
| D-KEFS semantic fluency                                   | -0.2559    | -0.1693    | 0.0231     | -0.2147    | -0.1335    | 0.1894     |
| D-KEFS semantic fluency shifting<br>(n correct answers)   | -0.2587    | -0.1101    | -0.0233    | -0.4408    | -0.1806    | -0.3041    |
| D-KEFS semantic fluency shifting<br>(n correct shiftings) | -0.2459    | -0.1066    | -0.0341    | -0.4630    | -0.2262    | -0.2907    |
| D-KEFS TMT 1                                              | -0.1558    | -0.1980    | -0.3632    | 0.2493     | -0.2421    | -0.0078    |
| D-KEFS TMT 2                                              | -0.1673    | -0.1599    | -0.4736    | 0.2316     | 0.0396     | -0.0196    |
| D-KEFS TMT 3                                              | -0.1806    | -0.2081    | -0.4052    | 0.2607     | -0.0422    | 0.0703     |
| <b>NCI group (n = 143)</b>                                |            |            |            |            |            |            |
|                                                           | <b>PC1</b> | <b>PC2</b> | <b>PC3</b> | <b>PC4</b> | <b>PC5</b> | <b>PC6</b> |
| Standard deviation                                        | 2.4816     | 1.7304     | 1.3896     | 1.2732     | 1.1431     | 0.9989     |
| Proportion of variance                                    | 0.3079     | 0.1497     | 0.0966     | 0.0811     | 0.0653     | 0.0499     |
| Cumulative proportion of variance                         | 0.3079     | 0.4576     | 0.5542     | 0.6352     | 0.7006     | 0.7505     |
| Individual test loadings                                  |            |            |            |            |            |            |
| MMSE                                                      | -0.1808    | 0.0205     | 0.0990     | 0.0844     | -0.2895    | 0.3132     |
| WAIS-IV Information total                                 | -0.1336    | -0.2211    | -0.2660    | 0.3220     | -0.3035    | 0.0016     |
| WAIS-IV Block Design total                                | -0.1521    | -0.3192    | -0.0710    | 0.1119     | -0.3895    | 0.0099     |
| WAIS-IV Digit Span total                                  | -0.2008    | -0.2993    | 0.3490     | 0.2186     | 0.1891     | -0.0636    |
| WAIS-IV Digit Span forward                                | -0.1590    | -0.2314    | 0.4195     | 0.1737     | 0.1976     | 0.0732     |
| WAIS-IV Digit Span backward                               | -0.1354    | -0.1883    | 0.4554     | 0.1949     | 0.0663     | -0.2893    |
| AVLT 1                                                    | -0.2679    | 0.1209     | 0.0926     | 0.0427     | 0.1153     | 0.0244     |
| AVLT 2                                                    | -0.2987    | 0.2470     | 0.0378     | 0.0316     | -0.0670    | 0.0269     |
| AVLT 3                                                    | -0.2727    | 0.3191     | 0.0107     | 0.0232     | -0.1281    | -0.0905    |
| AVLT 4                                                    | -0.3020    | 0.2807     | 0.0031     | 0.0001     | 0.0411     | -0.0802    |
| AVLT 5                                                    | -0.2927    | 0.2702     | -0.0095    | 0.0198     | -0.0523    | -0.0932    |
| AVLT total                                                | -0.3404    | 0.2976     | 0.0251     | 0.0267     | -0.0233    | -0.0582    |
| RCFT copy                                                 | -0.1355    | -0.1915    | -0.2582    | 0.3432     | -0.3464    | -0.1807    |
| D-KEFS verbal fluency FAS                                 | -0.1924    | -0.0926    | -0.0806    | 0.1030     | 0.2350     | 0.6857     |

|                                                           |         |         |         |         |         |         |
|-----------------------------------------------------------|---------|---------|---------|---------|---------|---------|
| D-KEFS semantic fluency                                   | -0.2502 | -0.1383 | -0.2887 | 0.0221  | 0.2414  | 0.2829  |
| D-KEFS semantic fluency shifting<br>(n correct answers)   | -0.2437 | -0.1726 | -0.2865 | -0.1547 | 0.3440  | -0.2959 |
| D-KEFS semantic fluency shifting<br>(n correct shiftings) | -0.2310 | -0.2233 | -0.3211 | -0.1214 | 0.2617  | -0.2950 |
| TMT 1                                                     | -0.1371 | -0.1993 | -0.0566 | -0.3436 | -0.0115 | 0.1187  |
| TMT 2                                                     | -0.1711 | -0.2340 | 0.1461  | -0.4784 | -0.2258 | -0.0418 |
| TMT 3                                                     | -0.1883 | -0.1177 | 0.1792  | -0.4917 | -0.2875 | 0.0866  |

---

The six first PCs are presented from each PCA.
